# Supplementary material for: Longitudinal Changes in Crisis and Broader Mental Health Service Use Following Access to Digital Support Tool Brain in Hand: An Observational Cohort Study
Source: Research Square preprint supplement (doi:10.21203/rs.3.rs-8613829/v1), 2026-01-19
Supplement: Supplementary file 1 [file fc198adc2845cd24e03af228.docx]

**Supplementary Materials**

***Supplementary Material A: Descriptive Statistics for Inverse Probability Weights (IPW)***

As shown in Table S1 stabilised inverse probability weights showed minimal dispersion (maximum weights < 1.5), with effective sample sizes close to the observed follow-up samples (ESS = 101 at 3 months; ESS = 105 at 6 months). This indicates limited weight instability. Given weight stability and similarities between weighted and unweighted models, further truncated models were not fit.

*Table S1 - Inverse Probability Weighting Descriptive Statistics*

| **Follow-up wave** | **n (observed)** | **Min weight** | **Median** | **Mean** | **90th pct** | **95th pct** | **99th pct** | **Max** | **Effective sample size** |
| --- | --- | --- | --- | --- | --- | --- | --- | --- | --- |
| 3 months | 102 | 0.87 | 0.98 | 1.00 | 1.09 | 1.12 | 1.23 | 1.23 | 101 |
| 6 months | 107 | 0.82 | 0.93 | 1.00 | 1.21 | 1.33 | 1.42 | 1.42 | 105 |

***Note.*** Weights were stabilised and trimmed at the 1st and 99th percentiles.

***Supplementary Material B: Sensitivity Analysis – Models Additionally Weighted with Mental Health Symptom Severity***

To assess whether differential attrition related to baseline mental health symptom severity influenced the primary findings, an additional sensitivity analysis was conducted in which inverse probability weights were derived from models that additionally included baseline depression (PHQ) and anxiety (GAD) scores. These variables were not included as covariates in the primary outcome models but were incorporated into the weighting models to account for their association with follow-up completion. Results from these IPW models including baseline mental health severity are shown in Tables S2 to S4 Estimates were highly consistent with the primary IPW-weighted analyses, with similar point estimates and overlapping confidence intervals across all outcomes and timepoints. This indicates that the observed reductions in crisis and expanded mental health service use were robust to additional adjustment for baseline mental health severity.

*Table S2 -* *IPW-weighted Model Results Including Baseline Mental Health: Marginal Support Access (Baseline and 3 Months)*

| **Crisis Definition** | **Time** | **p(any)** | **95% CI (p(any))** | **mean | any** | **95% CI (mean | any)** | **E[count]** | **95% CI (E[count])** |
| --- | --- | --- | --- | --- | --- | --- | --- |
| Crisis [IPW + MH] | Baseline | 0.442 | [0.365, 0.525] | 3.87 | [2.97, 5.01] | 1.71 | [1.246, 2.325] |
|  | 3m | 0.274 | [0.194, 0.373] | 3.49 | [2.39, 5.19] | 0.955 | [0.571, 1.575] |
| Expanded MH [IPW + MH] | Baseline | 0.645 | [0.565, 0.719] | 7.18 | [5.57, 9.17] | 4.63 | [3.486, 6.103] |
|  | 3m | 0.476 | [0.376, 0.574] | 5.60 | [4.10, 7.67] | 2.67 | [1.813, 3.874] |

***Note.***p(any) = probability of any crisis contact within 3-month period; mean | any = mean number of contacts among those with at least one contact; E[count] = mean number of contacts in 3-month period across sample. 95% CI = 95% confidence interval.

*Table S3 - IPW-weighted Model Results Including Baseline Mental Health: Marginal Support Access (Baseline and 6 Months)*

| **Crisis Definition** | **Time** | **p(any)** | **95% CI (p(any))** | **mean | any** | **95% CI (mean | any)** | **E[count]** | **95% CI (E[count])** |
| --- | --- | --- | --- | --- | --- | --- | --- |
| Crisis [IPW + MH] | Baseline | 0.443 | [0.364, 0.523] | 4.60 | [3.50, 6.05] | 2.04 | [1.454, 2.789] |
|  | 6m | 0.298 | [0.215, 0.400] | 2.90 | [1.97, 4.26] | 0.865 | [0.525, 1.415] |
| Expanded MH [IPW + MH] | Baseline | 0.644 | [0.562, 0.720] | 8.11 | [6.27, 10.46] | 5.23 | [3.919, 6.874] |
|  | 6m | 0.506 | [0.407, 0.602] | 4.17 | [3.07, 5.74] | 2.11 | [1.447, 3.040] |

***Note.***p(any) = probability of any crisis contact within 3-month period; mean | any = mean number of contacts among those with at least one contact; E[count] = mean number of contacts in 3-month period across sample. 95% CI = 95% confidence interval.

*Table S4 - IPW-weighted Model Results Including Baseline Mental Health – Follow-up Support Access Versus Baseline*

| **Crisis Definition** | **Time** | **IRR** | **95% CI (IRR)** | **Events per 100 Change** | **95% CI (Events per 100)** |
| --- | --- | --- | --- | --- | --- |
| Main crisis [IPW + MH] | 3m | 0.558 | [0.353, 0.885] | −75.7 | [−130.3, −18.0] |
| Expanded MH [IPW + MH] | 3m | 0.575 | [0.401, 0.822] | −197.0 | [−323.3, −74.4] |
| Main crisis [IPW + MH] | 6m | 0.424 | [0.254, 0.713] | −117.0 | [−191.8, −48.2] |
| Expanded MH [IPW + MH] | 6m | 0.404 | [0.275, 0.588] | −312.0 | [−469.0, −180.8] |

***Note.*** IRR = Incidence Rate Ratio (expected count at follow-up/expected count at baseline). 95% CI = 95% confidence interval.

***Supplementary Material C: Sensitivity Analysis - Unweighted Model Results***

Results from unweighted models are shown in Tables S5 to S7, for comparison with the primary IPW-weighted analyses. Estimates are directionally consistent and slightly larger in magnitude, consistent with attrition being associated with higher baseline service use.

*Table S5 - Unweighted Model Results: Marginal Support Access (Baseline and 3 months)*

| **Crisis Definition** | **Time** | **p(any)** | **95% CI (p(any))** | **mean | any** | **95% CI (mean | any)** | **E[count]** | **95% CI (E[count])** |
| --- | --- | --- | --- | --- | --- | --- | --- |
| Crisis [unweighted] | Baseline | 0.442 | [0.361, 0.526] | 3.89 | [2.97, 5.07] | 1.720 | [1.230, 2.351] |
|  | 3m | 0.254 | [0.181, 0.345] | 3.51 | [2.36, 5.27] | 0.894 | [0.534, 1.487] |
| Expanded MH [unweighted] | Baseline | 0.645 | [0.565, 0.718] | 7.20 | [5.61, 9.27] | 4.640 | [3.489, 6.140] |
|  | 3m | 0.451 | [0.356, 0.548] | 5.64 | [4.08, 7.77] | 2.540 | [1.714, 3.747] |

***Note.***p(any) = probability of any crisis contact within 3-month period; mean | any = mean number of contacts among those with at least one contact; E[count] = mean number of contacts in 3-month period across sample. 95% CI = 95% confidence interval.

*Table S6 - Unweighted Model Results: Marginal Support Access (Baseline and 6 months)*

| **Crisis Definition** | **Time** | **p(any)** | **95% CI (p(any))** | **mean | any** | **95% CI (mean | any)** | **E[count]** | **95% CI (E[count])** |
| --- | --- | --- | --- | --- | --- | --- | --- |
| Crisis [unweighted] | Baseline | 0.443 | [0.363, 0.523] | 4.56 | [3.48, 6.09] | 2.020 | [1.447, 2.815] |
|  | 6m | 0.271 | [0.194, 0.367] | 2.90 | [1.97, 4.33] | 0.785 | [0.472, 1.288] |
| Expanded MH [unweighted] | Baseline | 0.645 | [0.562, 0.718] | 8.05 | [6.20, 10.32] | 5.190 | [3.893, 6.839] |
|  | 6m | 0.476 | [0.380, 0.570] | 4.19 | [3.08, 5.72] | 2.000 | [1.351, 2.860] |

***Note.***p(any) = probability of any crisis contact within 3-month period; mean | any = mean number of contacts among those with at least one contact; E[count] = mean number of contacts in 3-month period across sample. 95% CI = 95% confidence interval.

*Table S7 - Unweighted Model Results – Follow-up Support Access Versus Baseline*

| **Crisis Definition** | **Time** | **IRR** | **95% CI (IRR)** | **Events per 100 Change** | **95% CI (Events per 100)** |
| --- | --- | --- | --- | --- | --- |
| Crisis [unweighted] | 3m | 0.520 | [0.325, 0.827] | −82.5 | [−138.7, −26.1] |
| Expanded MH [unweighted] | 3m | 0.548 | [0.380, 0.792] | −210.0 | [−341.5, −84.8] |
| Crisis [unweighted] | 6m | 0.388 | [0.229, 0.653] | −124.0 | [−197.2, −57.9] |
| Expanded MH [unweighted] | 6m | 0.384 | [0.262, 0.563] | −320.0 | [−471.2, −187.9] |

***Note.*** IRR = Incidence Rate Ratio (expected count at follow-up/expected count at baseline). 95% CI = 95% confidence interval.

***Supplementary Material D: Descriptive Differences in Change in Support Contact by Baseline Anxiety Distribution.***

When stratifying predicted counts by baseline anxiety severity (GAD-7), descriptively, baseline service use remained higher at greater anxiety levels. However, the magnitude of reduction over time was less consistently graded by anxiety severity (Figure S1). In contrast to the depression-stratified results, changes in predicted contacts did not show a clear pattern of larger reductions among those with the highest baseline anxiety. This suggests that baseline depression severity may be a stronger marker of differential change in service use in this cohort than baseline anxiety severity.

*Figure S1 – Predicted Crisis Support Access Counts for Low, Average, and High Baseline Anxiety Levels*

**
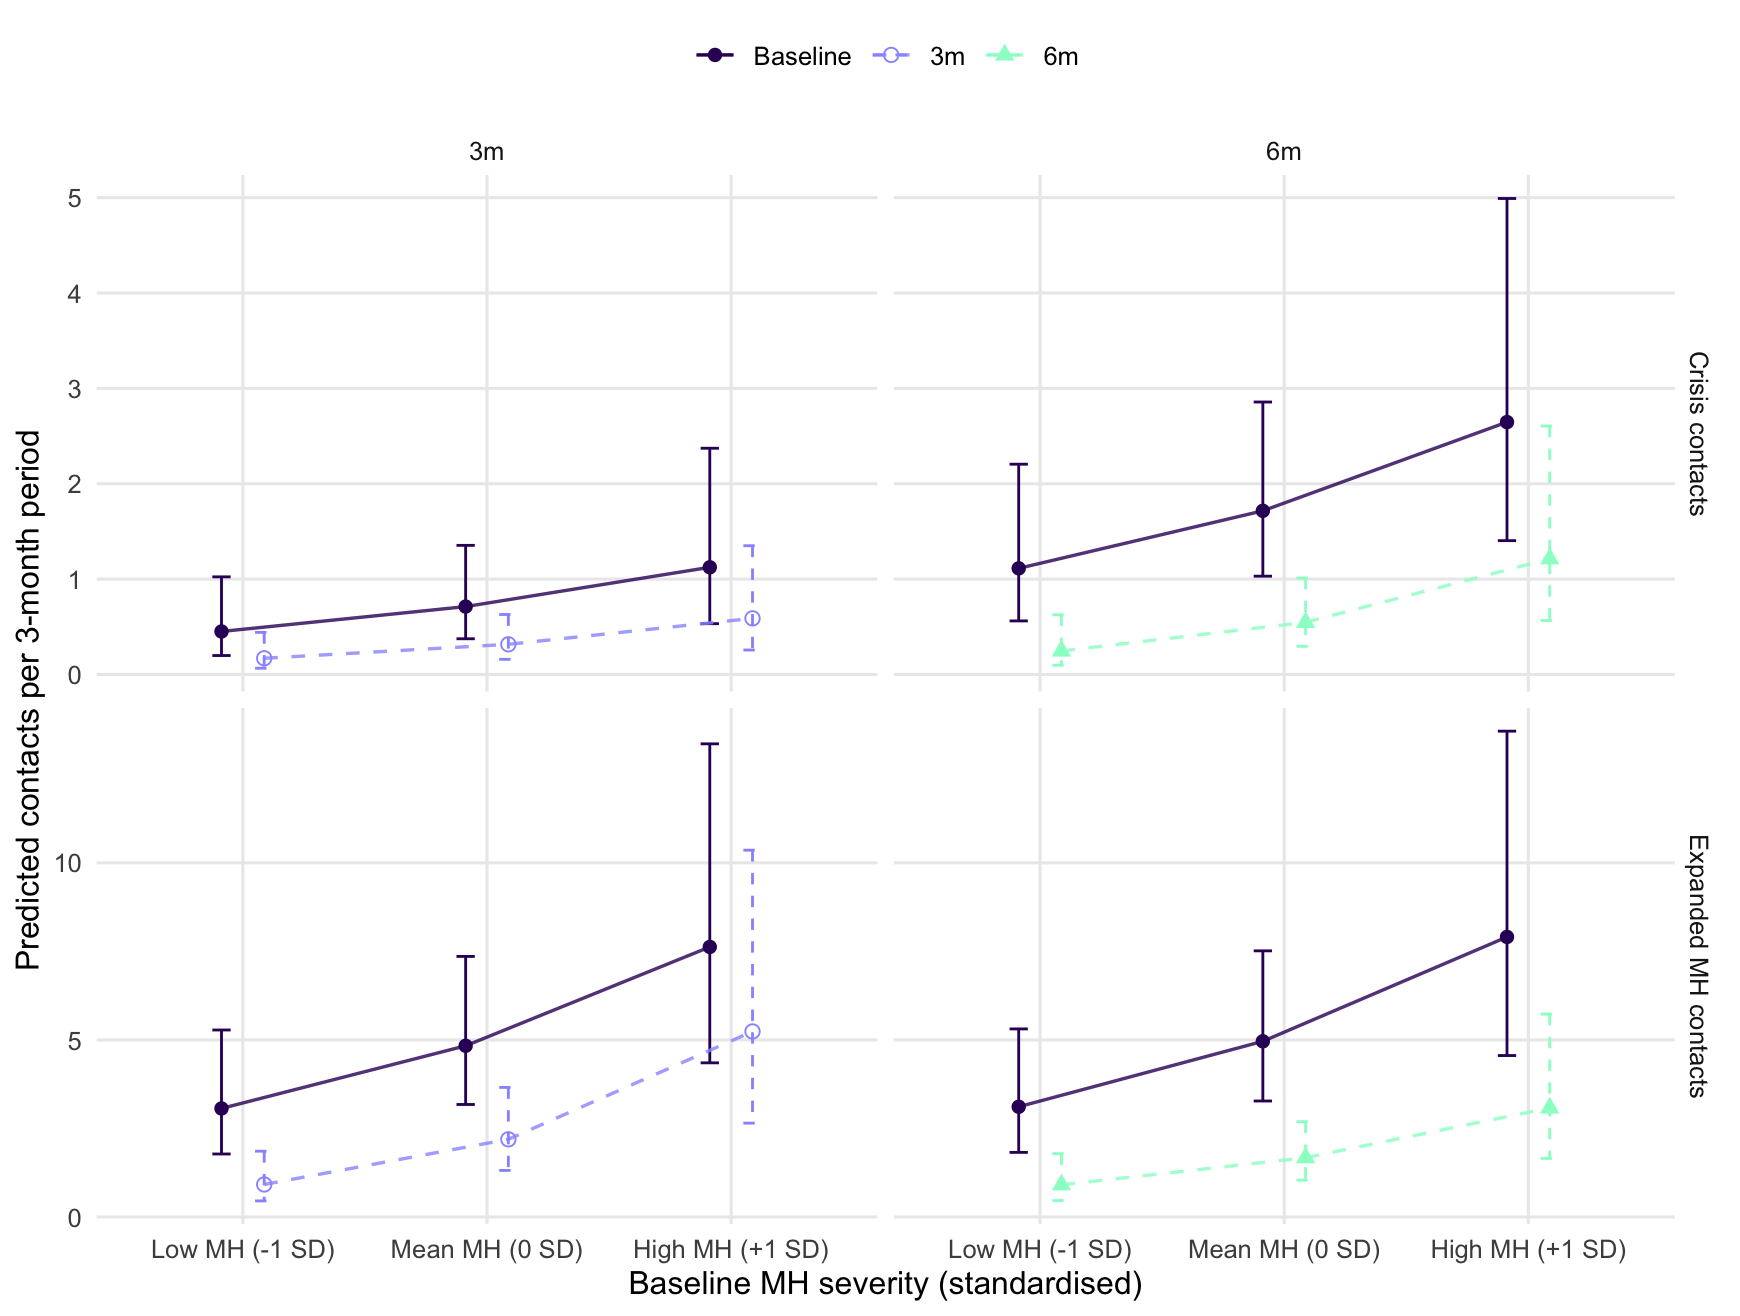
**
